# Supplementary material for: Longitudinal imaging of Caenorhabditis elegans in a microfabricated device reveals variation in behavioral decline during aging
Source: eLife journal article supplement (doi:10.7554/elife.26652), 2017-05-24
Supplement: supp [file elife-26652-supp-v1.zip]

Archive with 20 entries (20 files):
- elife_poa_e26652_Figure_3_Figure_Supplement_1.pdf
- elife_poa_e26652_Figure_6_Figure_Supplement_1.pdf
- elife_poa_e26652_Figure_8_Source_Data_File.zip
- elife_poa_e26652_Figure_1_Figure_Supplement_2.pdf
- elife_poa_e26652_Video_4.mov
- elife_poa_e26652_Supplementary_File_1_(Protocols).pdf
- elife_poa_e26652_Figure_7_Source_Data_File.zip
- elife_poa_e26652_Figure_1_Figure_Supplement_4.pdf
- elife_poa_e26652_Supplementary_File_6_(scripts).zip
- elife_poa_e26652_Video_2.mov
- elife_poa_e26652_Figure_1_Figure_Supplement_1.pdf
- elife_poa_e26652_Supplementary_File_5_(software).zip
- elife_poa_e26652_Video_3.mov
- elife_poa_e26652_Video_1.mov
- elife_poa_e26652_Supplementary_File_2_(mold_STL).zip
- elife_poa_e26652_Figure_3_Source_Data_File.zip
- elife_poa_e26652_Supplementary_File_4_(hardware_details).zip
- elife_poa_e26652_Supplementary_File_3_(mold_STL).zip
- elife_poa_e26652_Figure_5_Figure_Supplement_1.pdf
- elife_poa_e26652_Figure_1_Figure_Supplement_3.pdf
