# Supplementary material for: Longitudinal imaging of Caenorhabditis elegans in a microfabricated device reveals variation in behavioral decline during aging
Source: eLife journal article supplement (doi:10.7554/elife.26652), 2017-05-24
Supplement: supp [file ImagingRig_Checklist.xlsx]

## Sheet: Sheet1
Item	Quantity	Cost per item	Link	Total item cost	Function	Additional comments
Black acrylic sheet (12”x12”, ¼” thickness)	1	9.42	http://www.mcmaster.com/#8505k91/=ryndm5	9.42	Roof of imaging rig	Needs to be drilled (1/4" hole)
Aluminum sheet (12”x12”, ¼” thickness)	1	43.01	http://www.mcmaster.com/#89155k242/=rynvnv	43.01	Base of imaging rig	Needs to be drilled and tapped (1/4"-20 tap)
Post clamps	2	29	http://www.thorlabs.com/thorproduct.cfm?partnumber=C1498	58	Supports imaging platform and camera
Mounting post (4” length, 1.5” diameter)	1	38	http://www.thorlabs.com/thorproduct.cfm?partnumber=P4	38	Supports camera
Mounting post (12” length, 1.5” diameter)	1	79	http://www.thorlabs.com/thorproduct.cfm?partnumber=P12	79	Vertical axis supporting roof
Stainless steel optical post (1” length, 1/2” diameter)	1	4.74	http://www.thorlabs.com/thorproduct.cfm?partnumber=TR1	4.74	Supports imaging platform
Red LED strips (4.7” length)	4	6.99	http://www.oznium.com/led-flex-strips	27.96	Illumination	Can be soldered together and used with a single power supply
Power supply (3-12 V)	1	14.95	http://www.mpja.com/3-12V-2A-Selectable-Output-Supply/productinfo/9902%20PS/	14.95	Power supply for LEDs
USB Monochrome Camera (2592x1944 pixels)	1	419	http://www.theimagingsource.com/en_US/products/cameras/usb-ccd-mono/dmk72buc02/	419	Acquires images
Camera Lens	1	294.95	http://www.bhphotovideo.com/bnh/controller/home?O=&sku=404222&is=REG&Q=&A=details	294.95	Focuses image onto camera sensor
Glass sheet (8"x8", 1/4" thickness)	1	24.62	http://www.mcmaster.com/#8476k18/=rynpsr	24.62	Imaging platform
Stainless steel set screws (1/4"-20, 1/2" length)	1	5.5	http://www.thorlabs.com/thorproduct.cfm?partnumber=SS25S050	5.5	Secures optical posts
Black rubberized fabric	1	46	http://www.thorlabs.com/thorproduct.cfm?partnumber=BK5	46	Shields imaging rig from outside light
Stainless steel cap screw (1/4"-20, 5/8" length)	1	8	http://www.thorlabs.com/thorproduct.cfm?partnumber=SH25S063	8	Secures optical posts
Mini USB cable	1	5.49	http://www.amazon.com/AmazonBasics-A-Male-Mini-B-Cable-Meters/dp/B001TH7GUK/ref=sr_1_2?ie=UTF8&qid=1400080095&sr=8-2&keywords=amazon+mini+usb+cable	5.49	Connects camera to computer
Black masking tape	1	8.9	http://www.thorlabs.com/thorproduct.cfm?partnumber=T137-1.0	8.9	Secures blackout material to imaging rig
Binder clips	1	3.79	http://www.officedepot.com/a/products/561339/Office-Depot-Brand-Binder-Clips-Medium/?cm_mmc=PLA-_-Google-_-Basic_Supplies-_-561339-IQ_PE%20&Channel=Google&mr:trackingCode=92BB1774-11DE-DE11-974B-0019B9C043EB&mr:referralID=NA&mr:device=c&mr:adType=pla_multichannel&mr:ad=28889904956&mr:keyword=&mr:match=&mr:filter=50816818436	3.79	Binds blackout material together and facilitates opening and closing imaging rig
Aluminum bar	1	4.41	http://www.mcmaster.com/#9447t33/=ryo2fg	4.41	Supports imaging platform	Needs to be cut into 2" long pieces, drilled, tapped (8-32 tap), and epoxied to glass imaging platform
Lens spacers set (LAexSet)	1	24	http://www.theimagingsource.com/en_US/products/optics/tubes/	24	Aids in focusing the image
Stainless steel cap screw (1/4"-20, 3/8" length)	1	7.5	http://www.thorlabs.com/thorproduct.cfm?partnumber=SH25S038	7.5	Secures imaging platform to C-clamp
Total cost				1127.24
