# Supplementary material for: Longitudinal imaging of Caenorhabditis elegans in a microfabricated device reveals variation in behavioral decline during aging
Source: eLife journal article supplement (doi:10.7554/elife.26652), 2017-05-24
Supplement: supp [file LightBox_Checklist.xlsx]

## Sheet: Sheet1
Item	Quantity	Cost per item	Link	Total item cost	Function	Additional comments
Labjack (or Nidaq)	1	108	https://labjack.com/products/u3	108	Control LED
Blue LEDs	2	91.49	http://www.mouser.com/Search/ProductDetail.aspx?R=CBT-120-B-C11-KM301virtualkey65110000virtualkey896-CBT120BC11KM301	182.98
Power supply	1	269	http://www.mpja.com/0-30V-20A-Variable-Benchtop-Power-Supply/productinfo/29950+PS	269	Powers LEDs
Mirrored acrylic	4	125	http://www.estreetplastics.com/Default.asp	500	Compose the light box for uniform illumination	10 pieces: 9” x 8”, 5 pieces: 9” x 4.5”, 5 pieces: 6.5” x 4.5”; make 5 light boxes
Solid State relay	1	50	http://www.newark.com/schneider-electric-magnecraft/6325axxmds-dc3/ssr-panel-mount-200vdc-32vdc-25a/dp/10M9738?ost=solid+state+relay&categoryId=800000065503&searchView=table&iscrfnonsku=false	50	Switch that enables Matlab control of LEDs
16 gauge electrical wire	1	11.22	https://www.delcity.net/store/16-Gauge-Wire/p_181399.h_181707.r_IF1003?mkwid=szFbT1lTx&crid=38094426869&mp_kw=&mp_mt=&gclid=COHyo-LM09ICFciNswodLFcKkw	11.22	withstands current exceeding 20 A
aluminum heat sink	1	12.95	http://www.mpja.com/5-7_8-X-2-3_4-Aluminum-Heatsink/productinfo/32088+HK/	12.95	Heat sink for LEDs	requires 4 holes to be drilled to fasten LEDs with nylon screws
super-thin electrical tape	1	32.4	https://www.mcmaster.com/#77075a24/=16qioog	32.4		placed between LEDs and heat sink to electrically isolate LEDs
nylon screws	1	5.79	https://www.mcmaster.com/#95868a260/=16qio0m	5.79	Fastens LEDs to heat sink while maintaining electrical isolation
thermal paste	1	34.07	https://www.ellsworth.com/products/by-market/consumer-products/thermally-conductive-materials/lubricants-greases/dow-corning-340-heat-sink-compound-lubricantgrease-white-142-g-tube/?gclid=CNTi3fzL09ICFUhYDQodAqEHKw	34.07	Provides thermal contact between LEDs and heat sink	Place a dab between LEDs and heat sink prior to fastening with nylon screw
thermal fuse	2	2.16	http://www.newark.com/nte-electronics/nte8076/fuse-thermal-77-c-15a-277v/dp/29C4795	4.32	prevents LED overheating in case of relay failure	Two thermal fuses should be connected in parallel. This parallel circuit should then be connected in series with the 2 LEDs and should be in thermal contact with the heat sink.
aluminum bar	1	1.15	https://www.mcmaster.com/#8975k591/=16qj1w5	1.15	For attaching thermal fuses to heat sink	Should be cut into 3/4" long bars. Requires 3 holes to be drilled: 2 for thermal fuses and one to attach the apparatus to the heat sink.
Total cost				1211.88
