# Supplementary figures and images for: Longitudinal imaging of Caenorhabditis elegans in a microfabricated device reveals variation in behavioral decline during aging
Source: eLife journal article supplement (doi:10.7554/elife.26652), 2017-05-24

**a**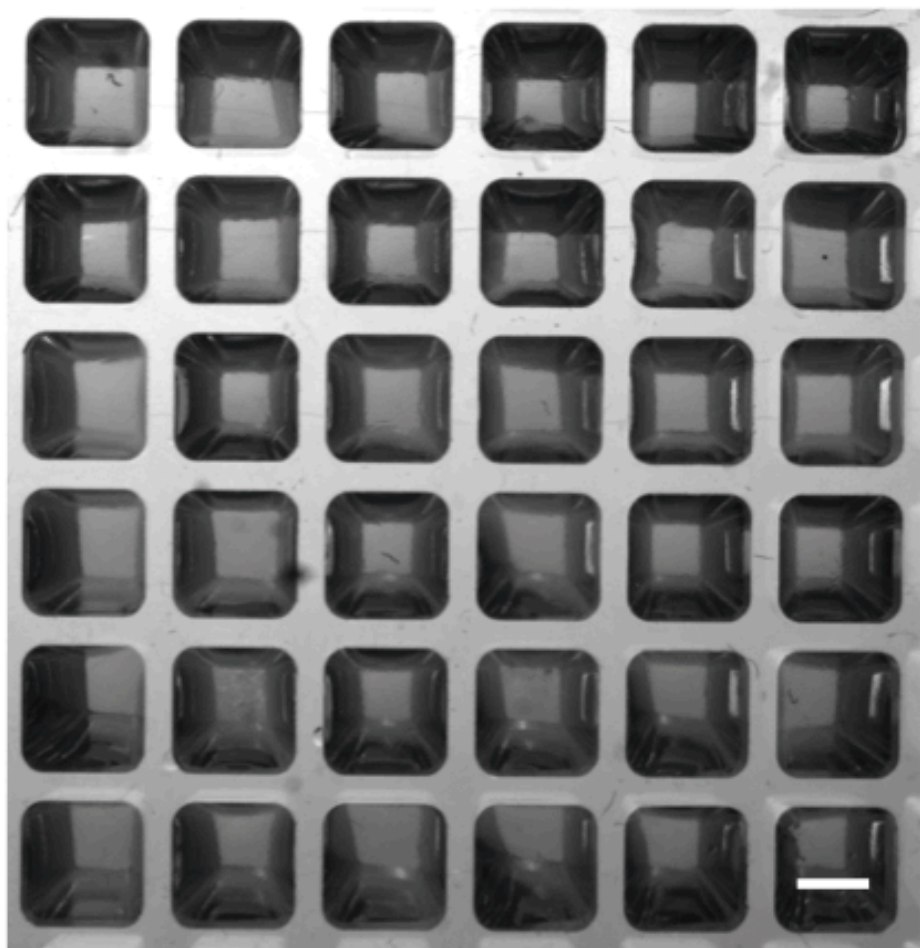**b**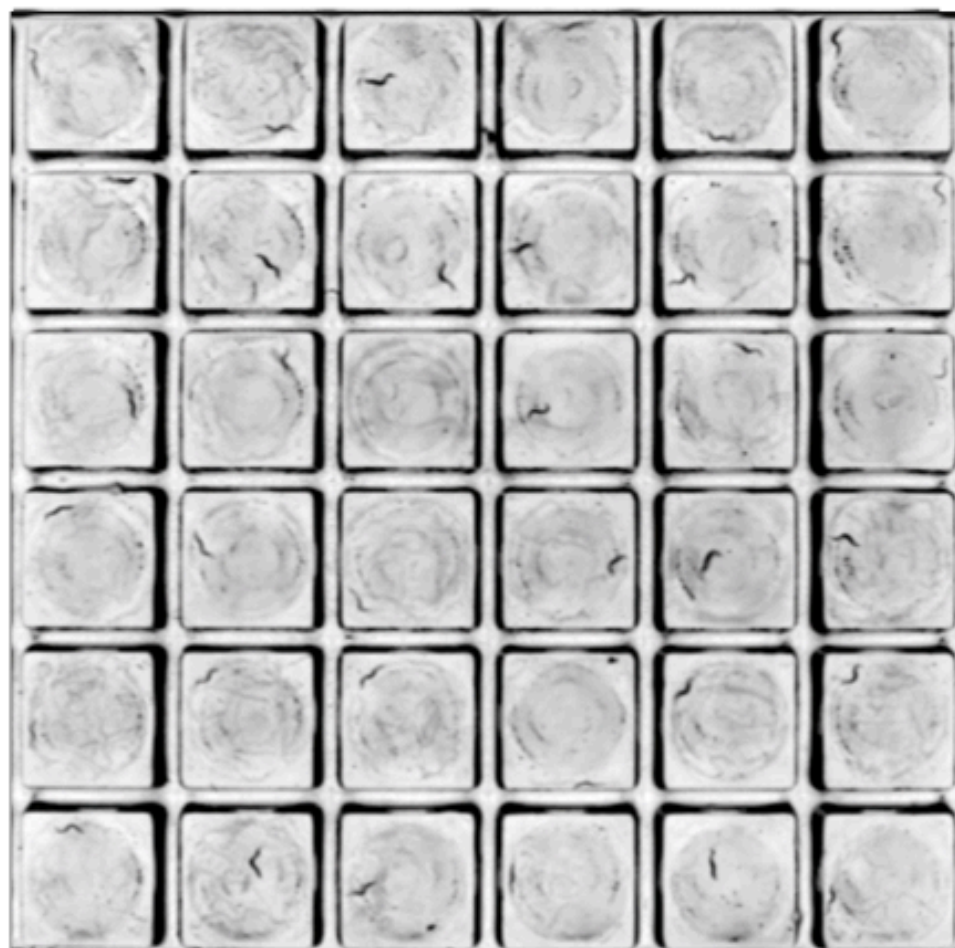

Supplement: supp [file elife-26652-supp-v1.zip]

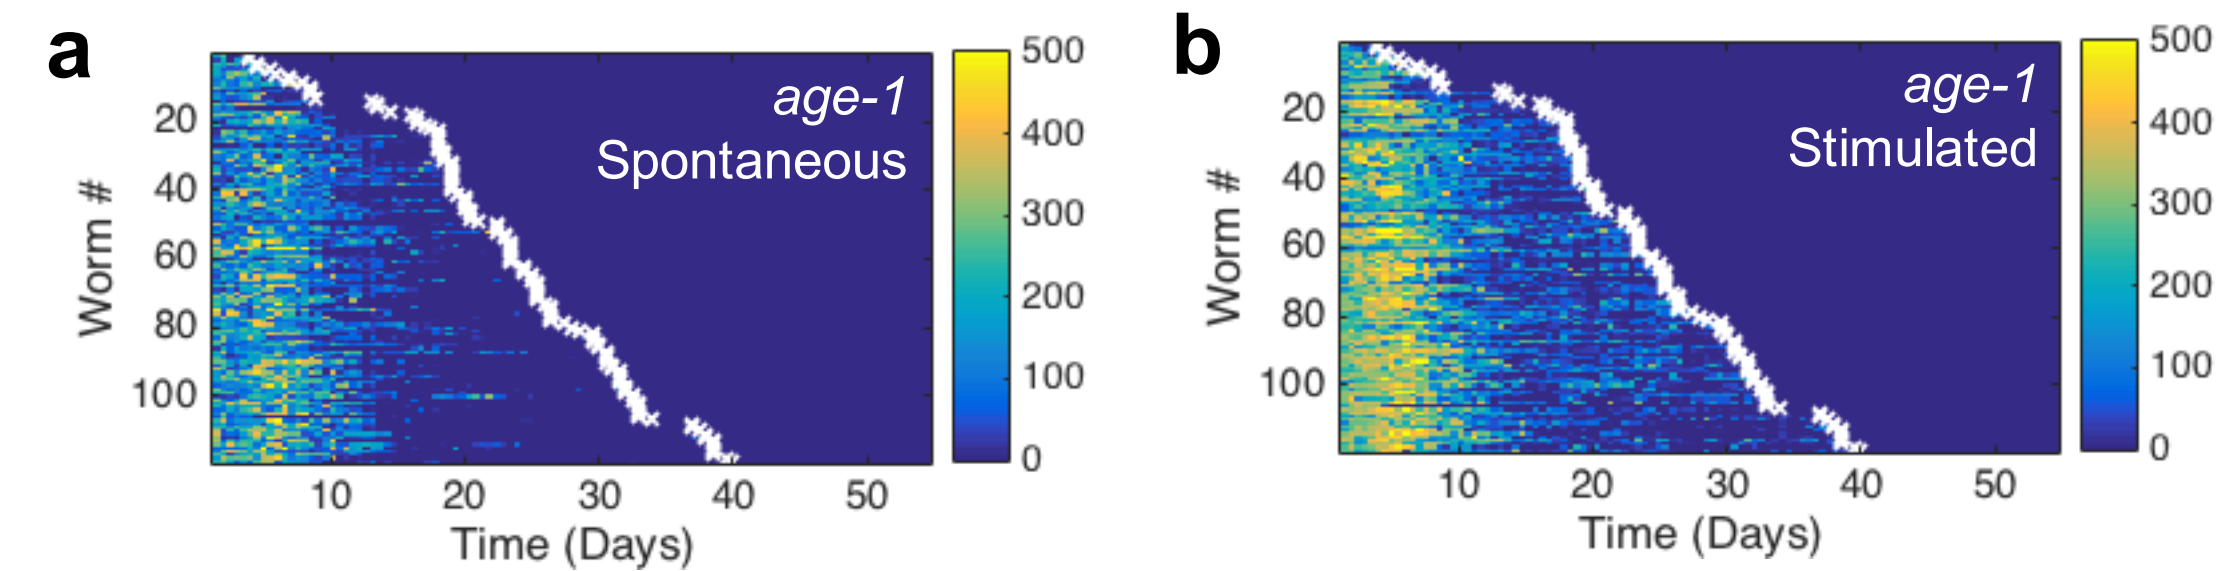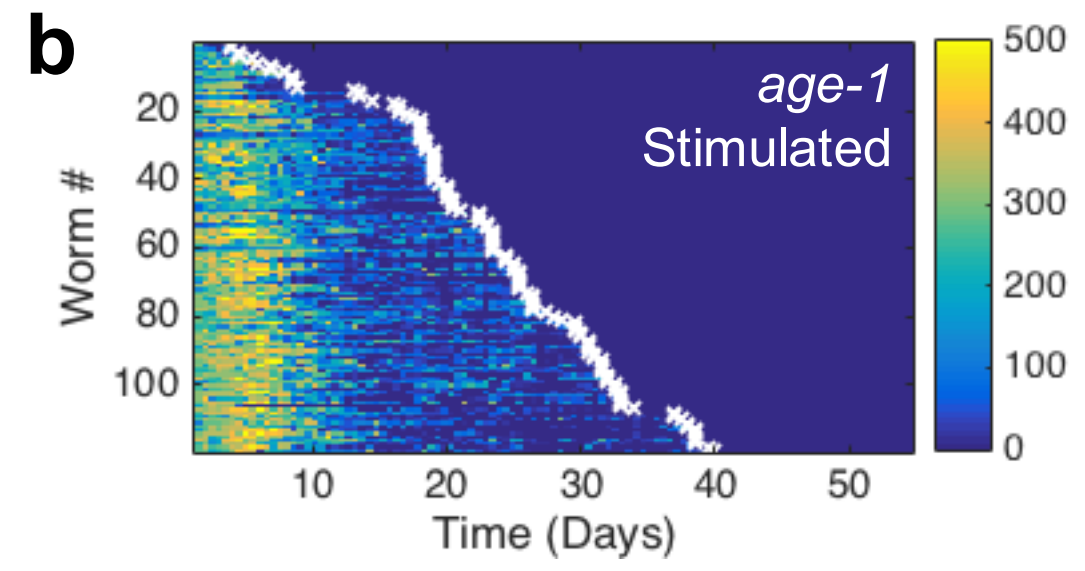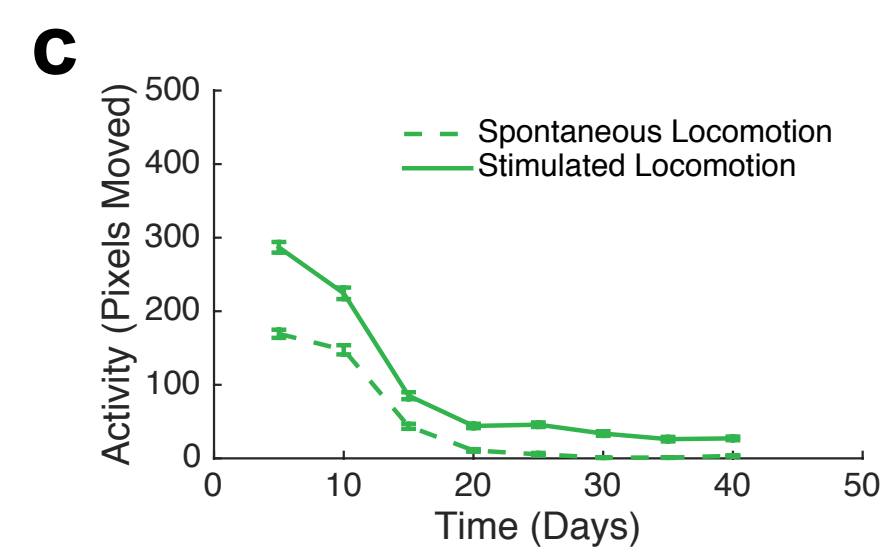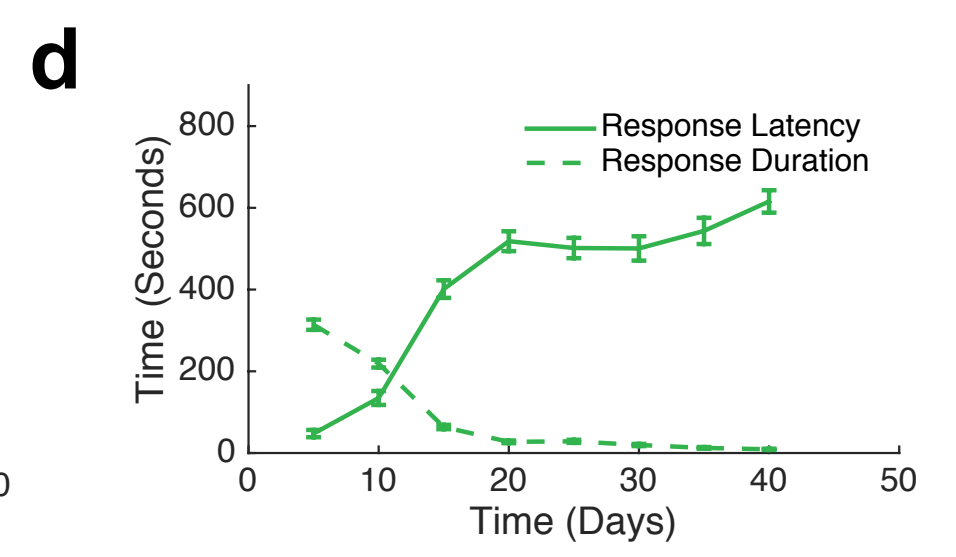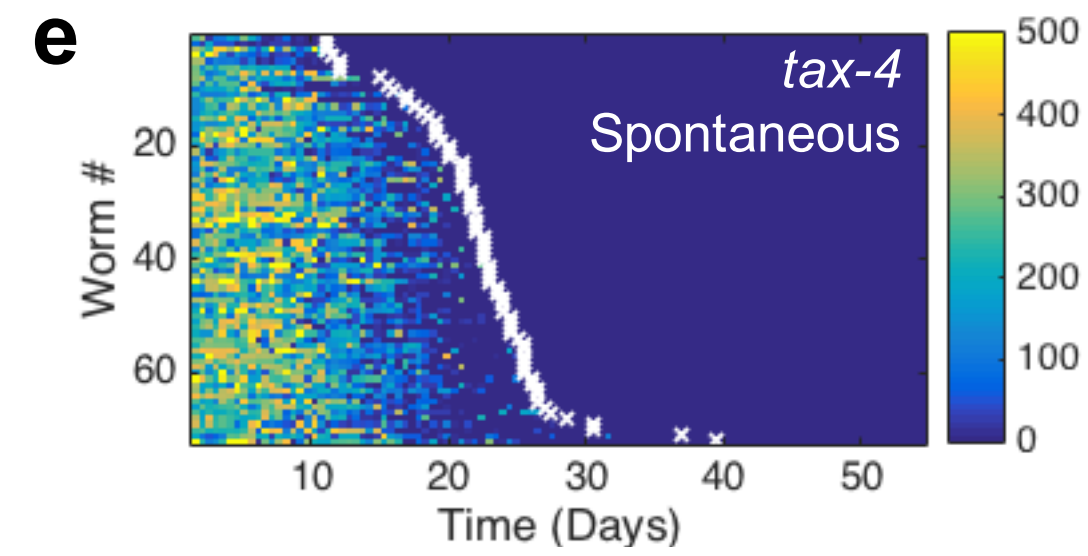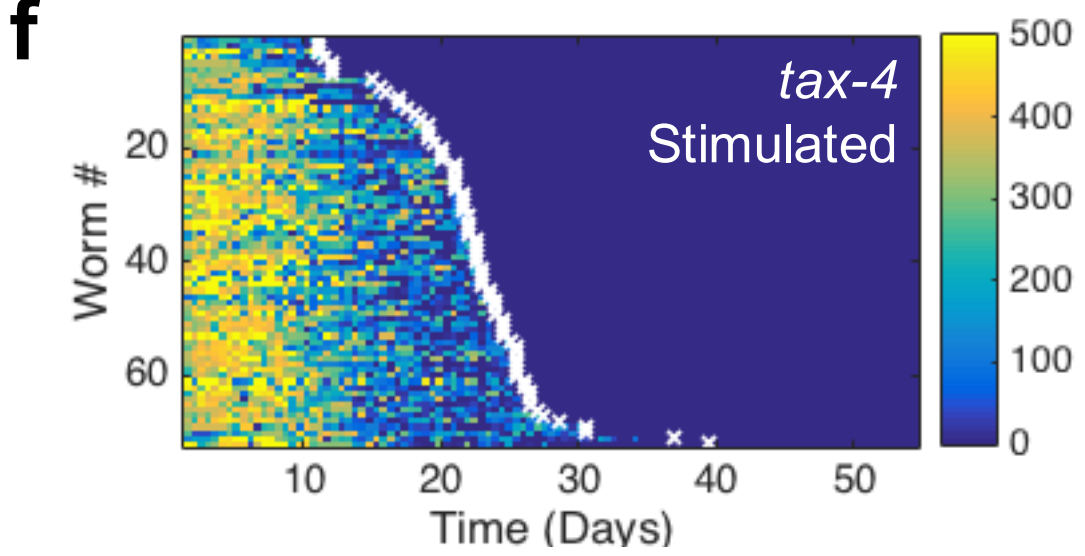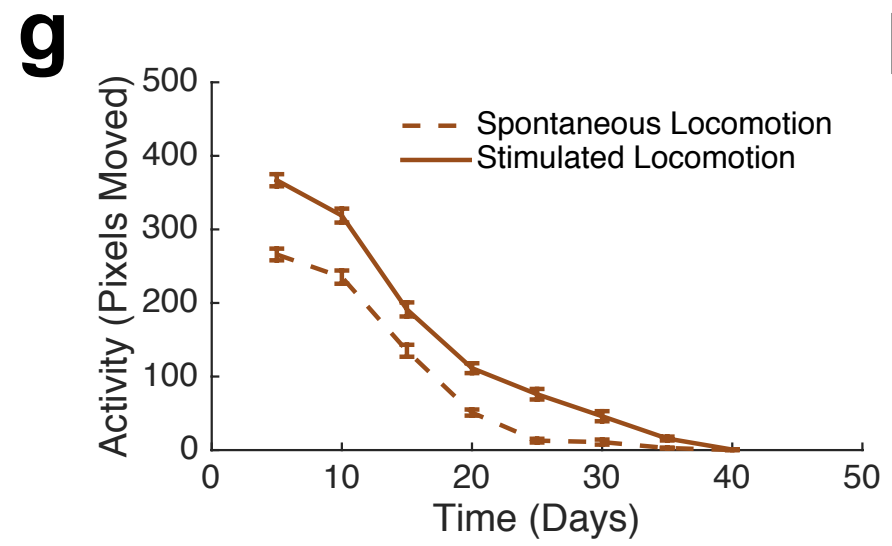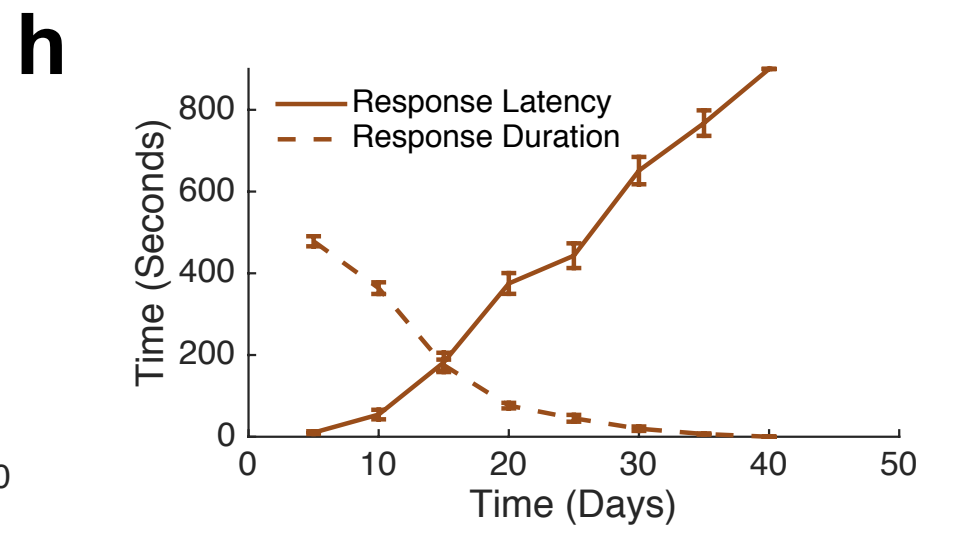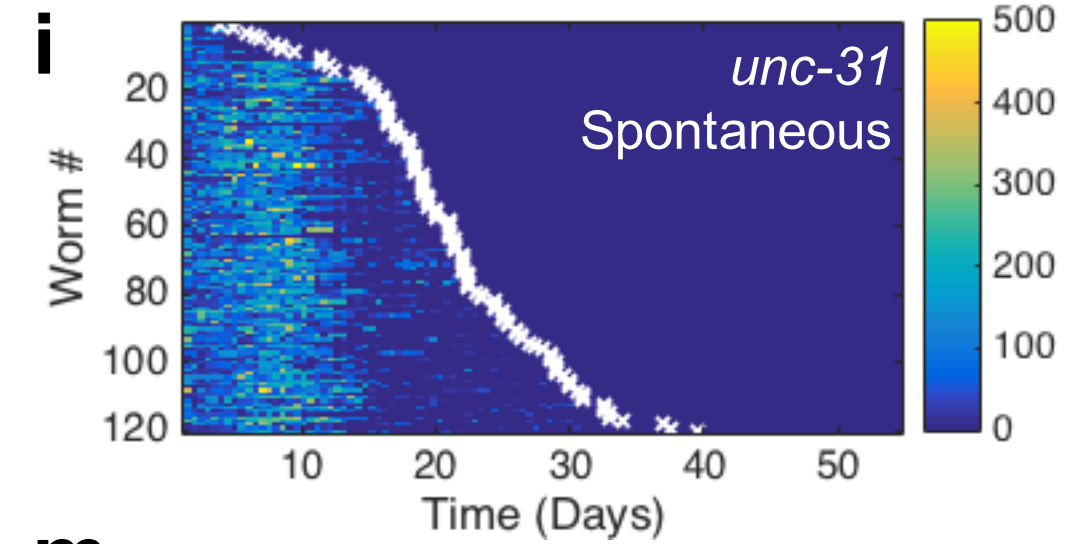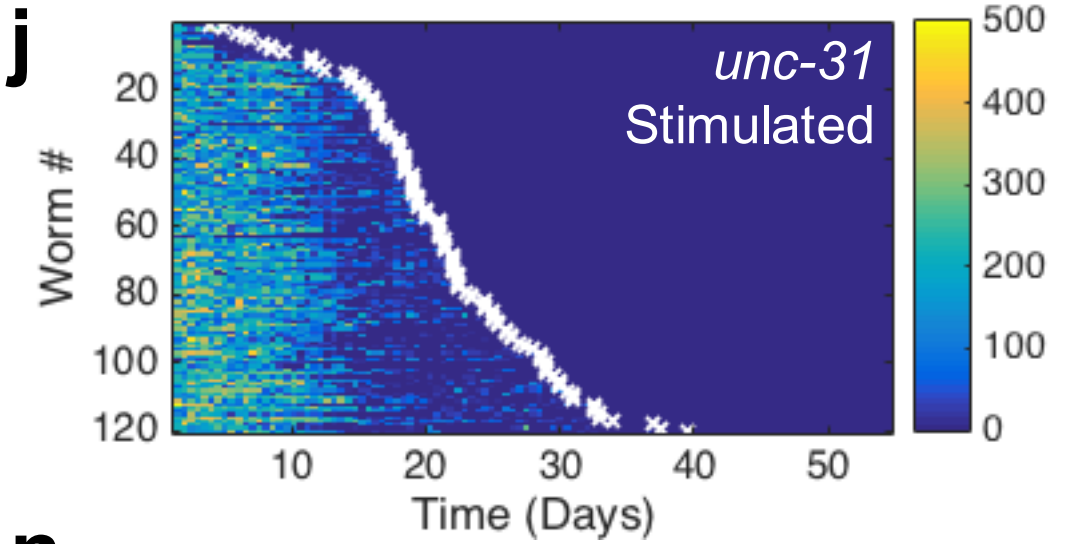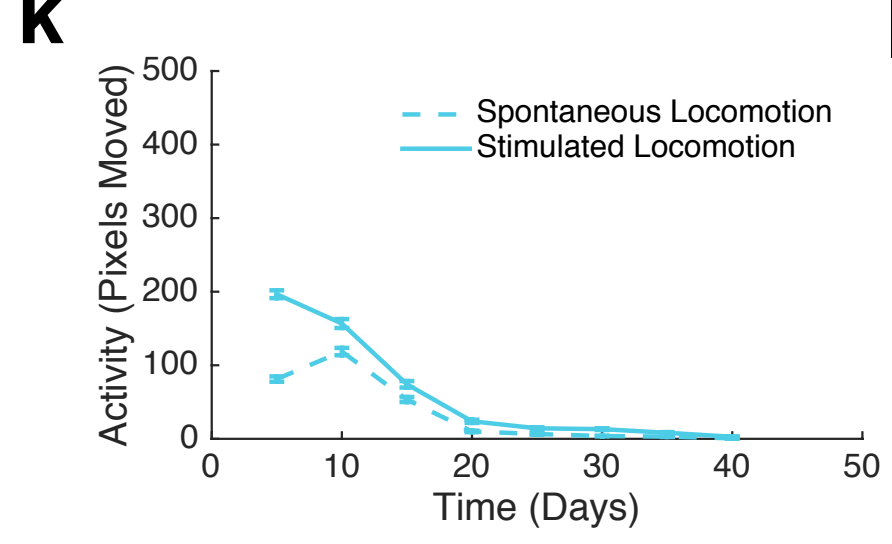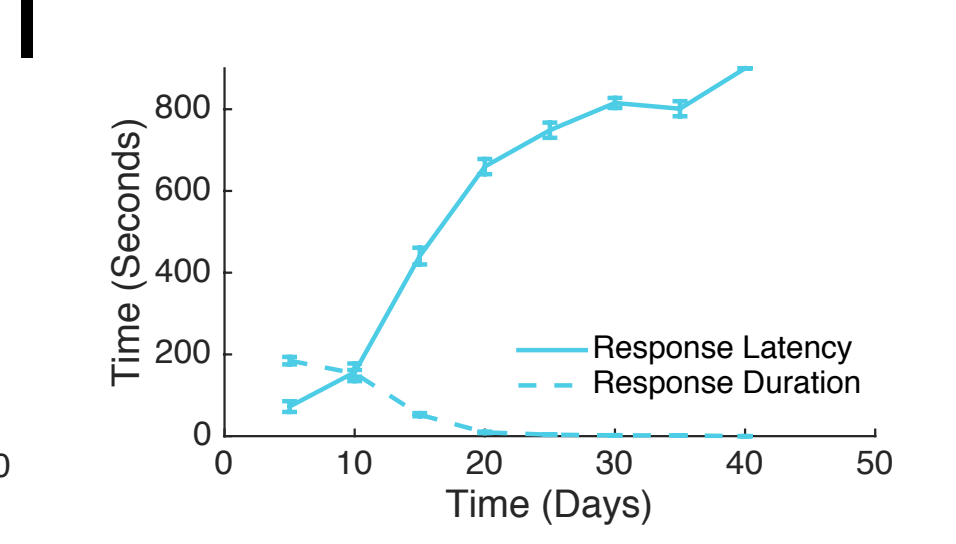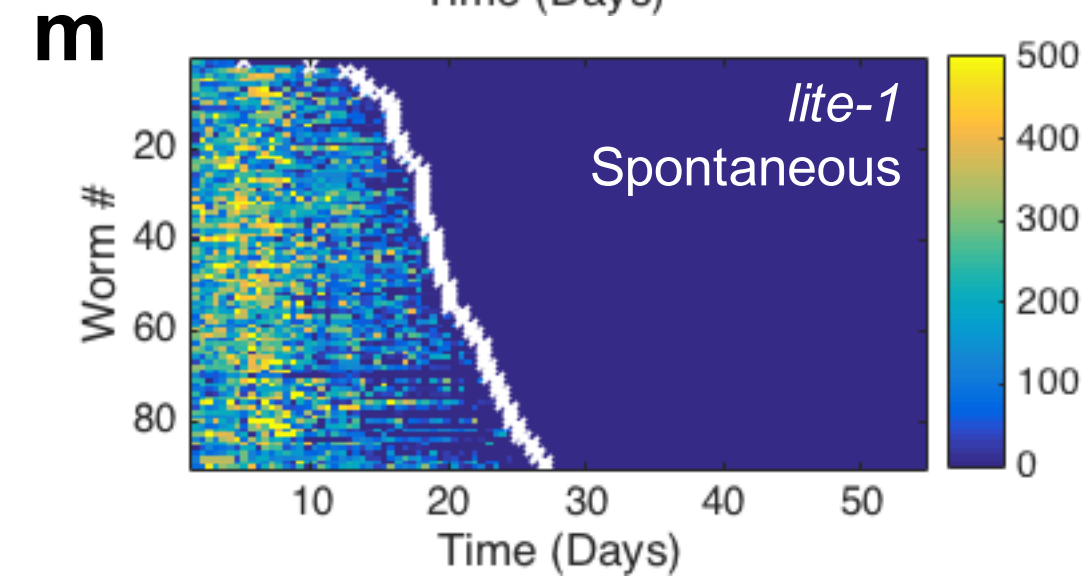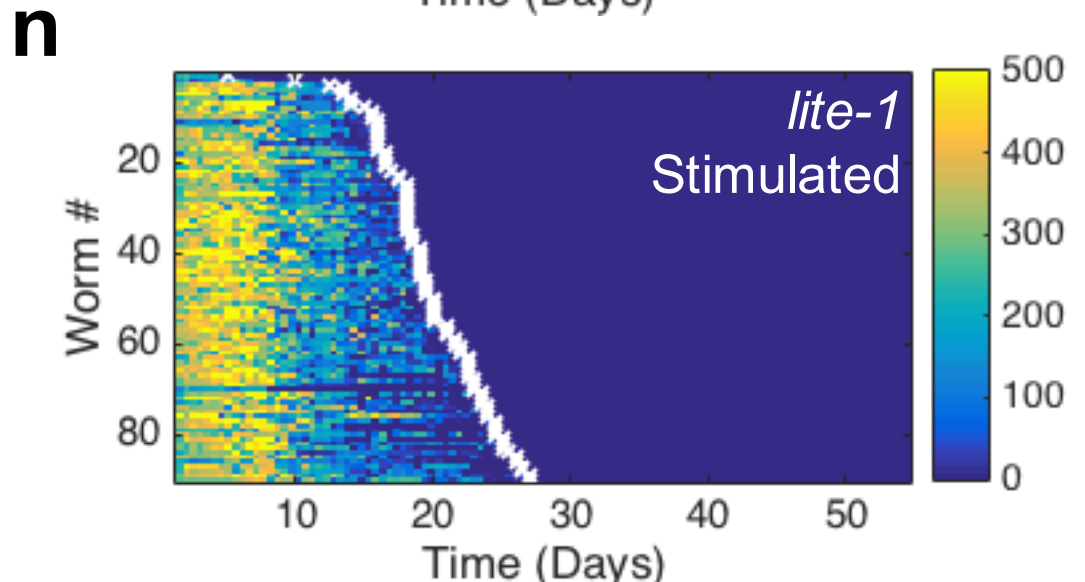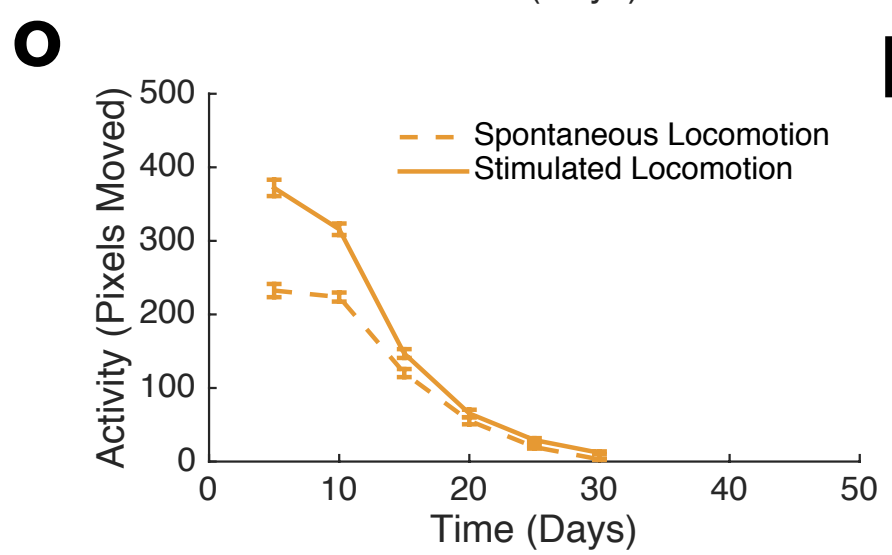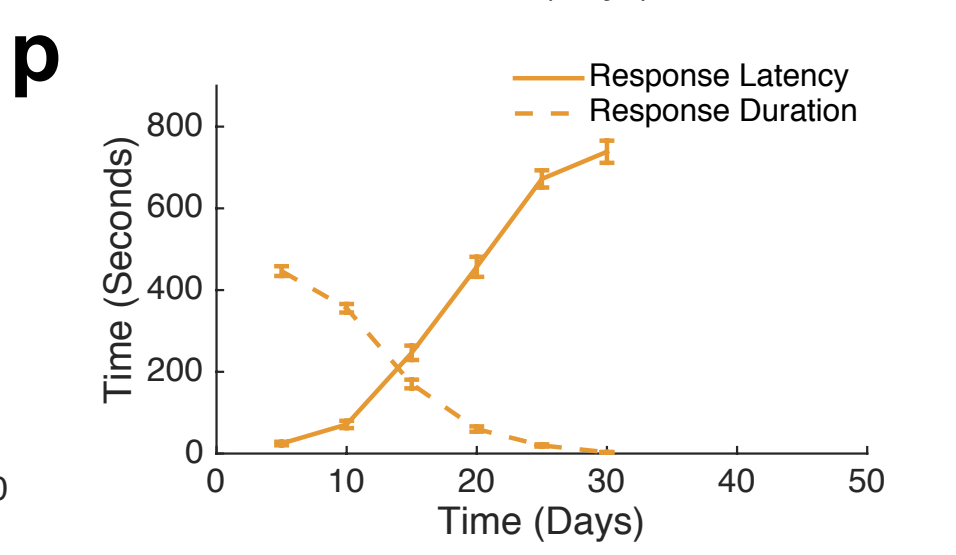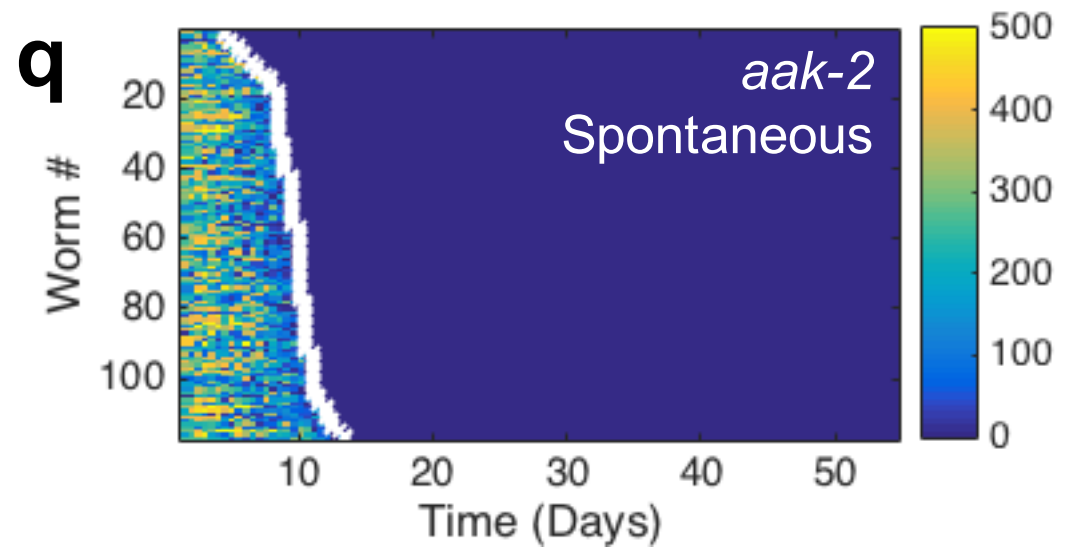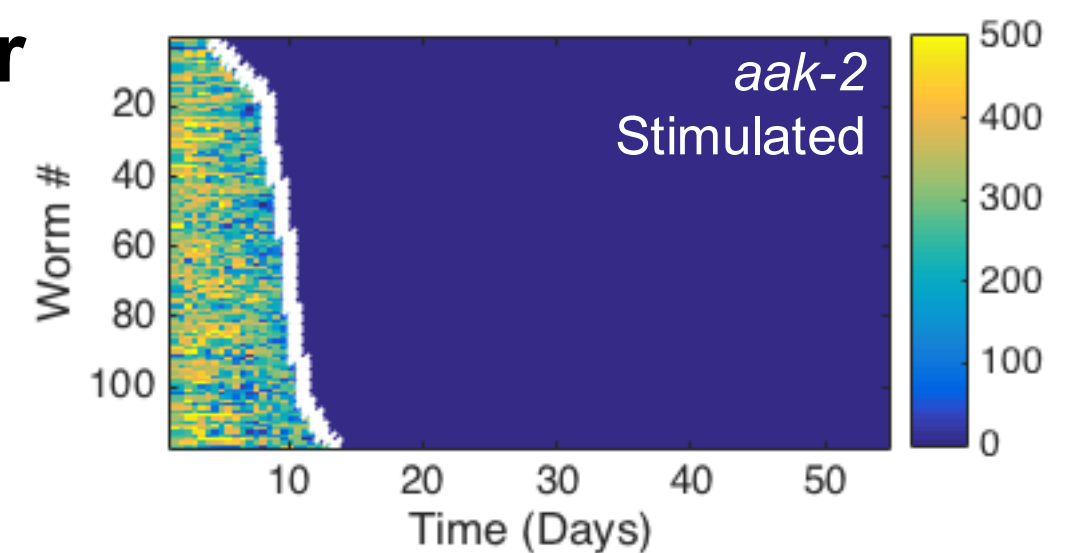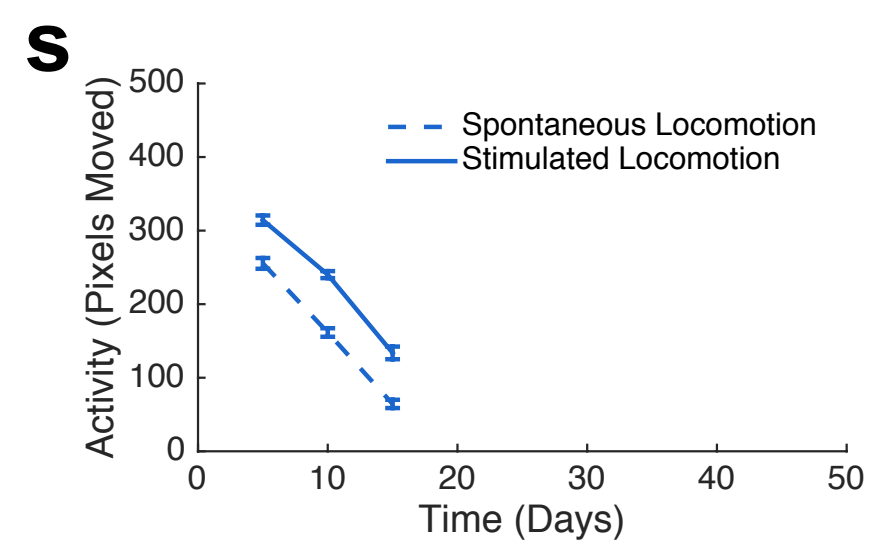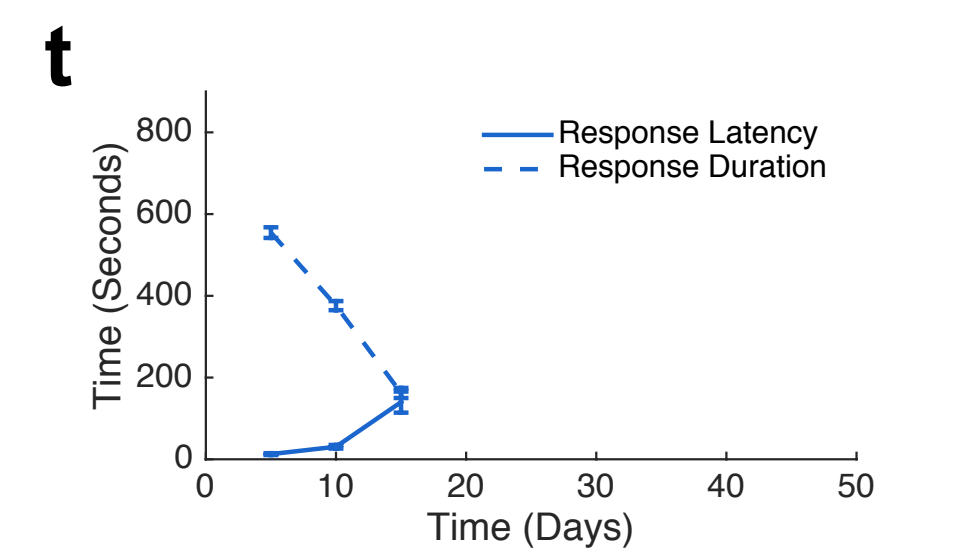

Supplement: supp [file elife-26652-supp-v1.zip]

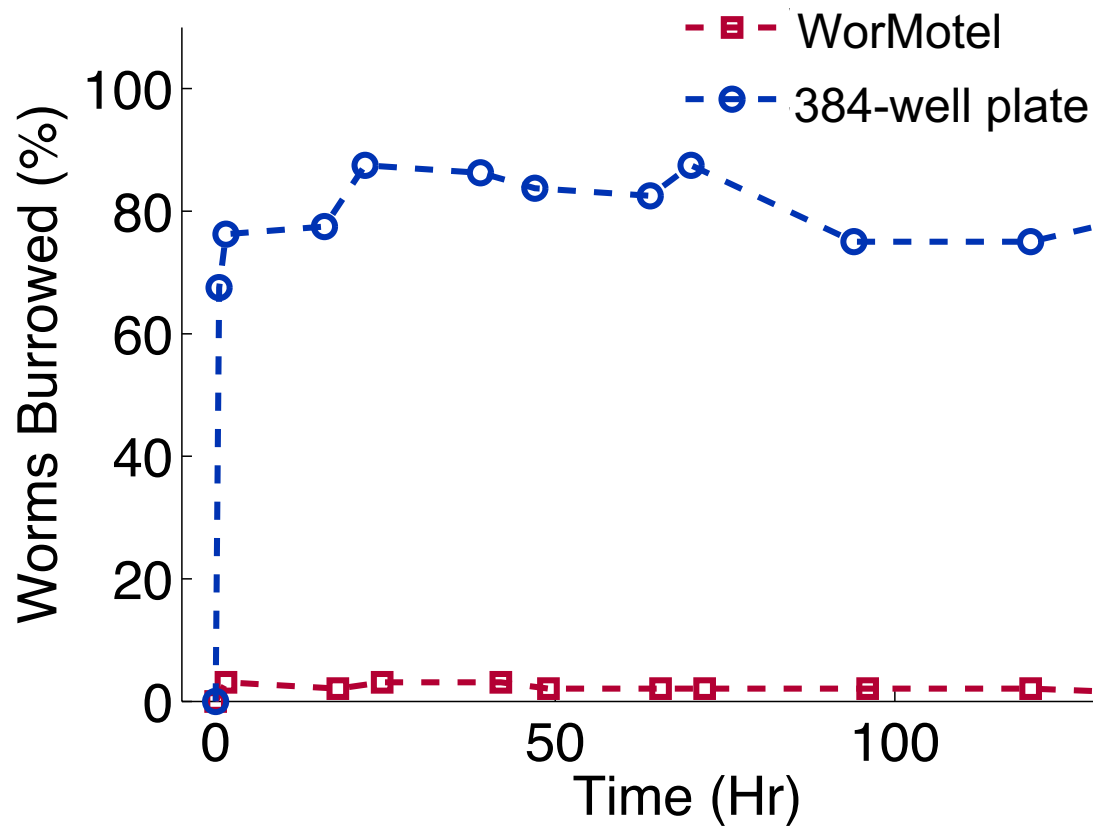

Supplement: supp [file elife-26652-supp-v1.zip]

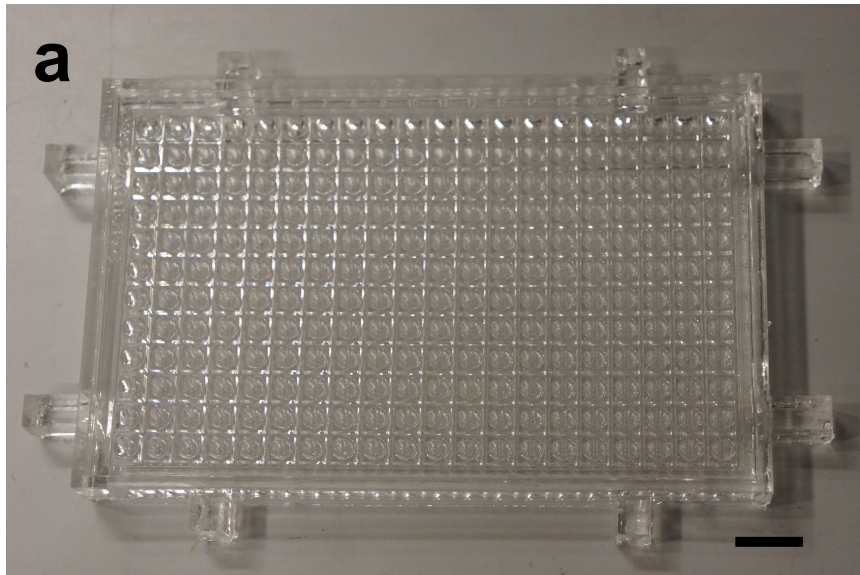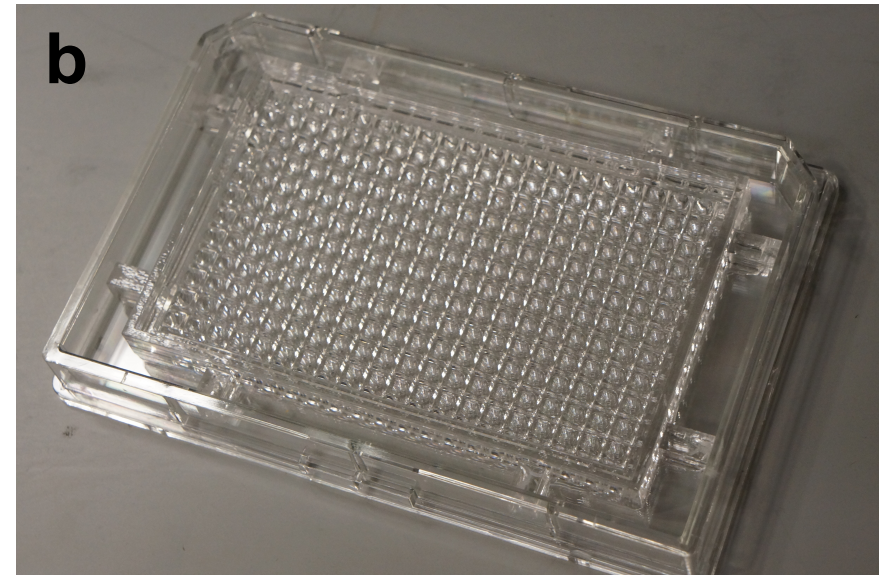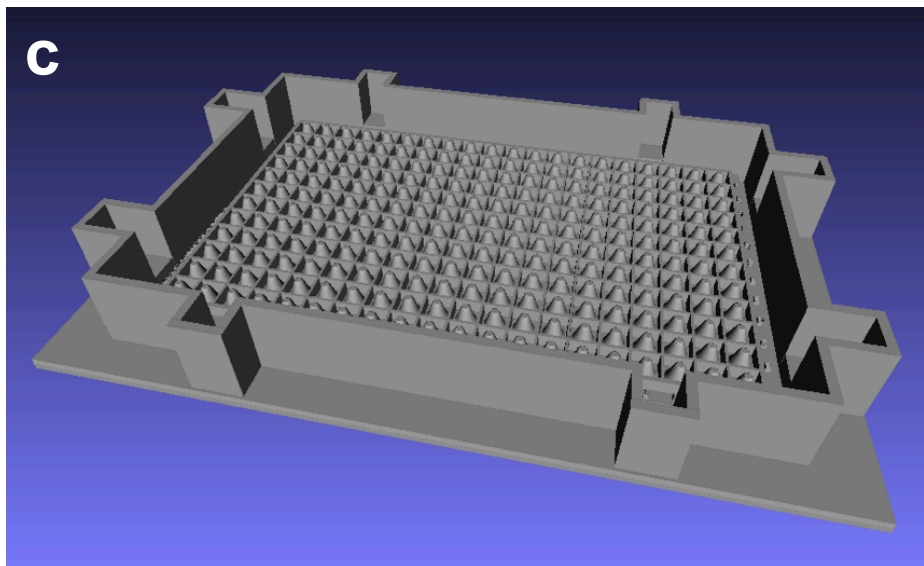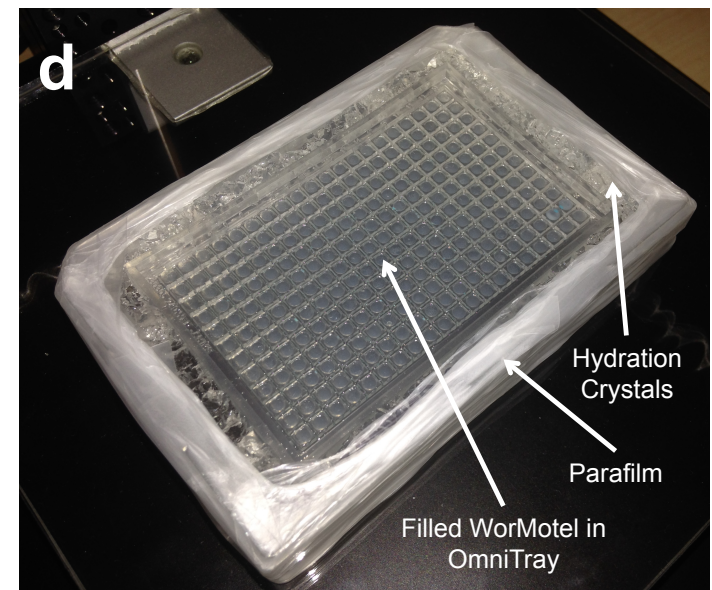

Supplement: supp [file elife-26652-supp-v1.zip]

Plate  
carousel

Plate robot

Temp.  
controller

Imaging  
systems

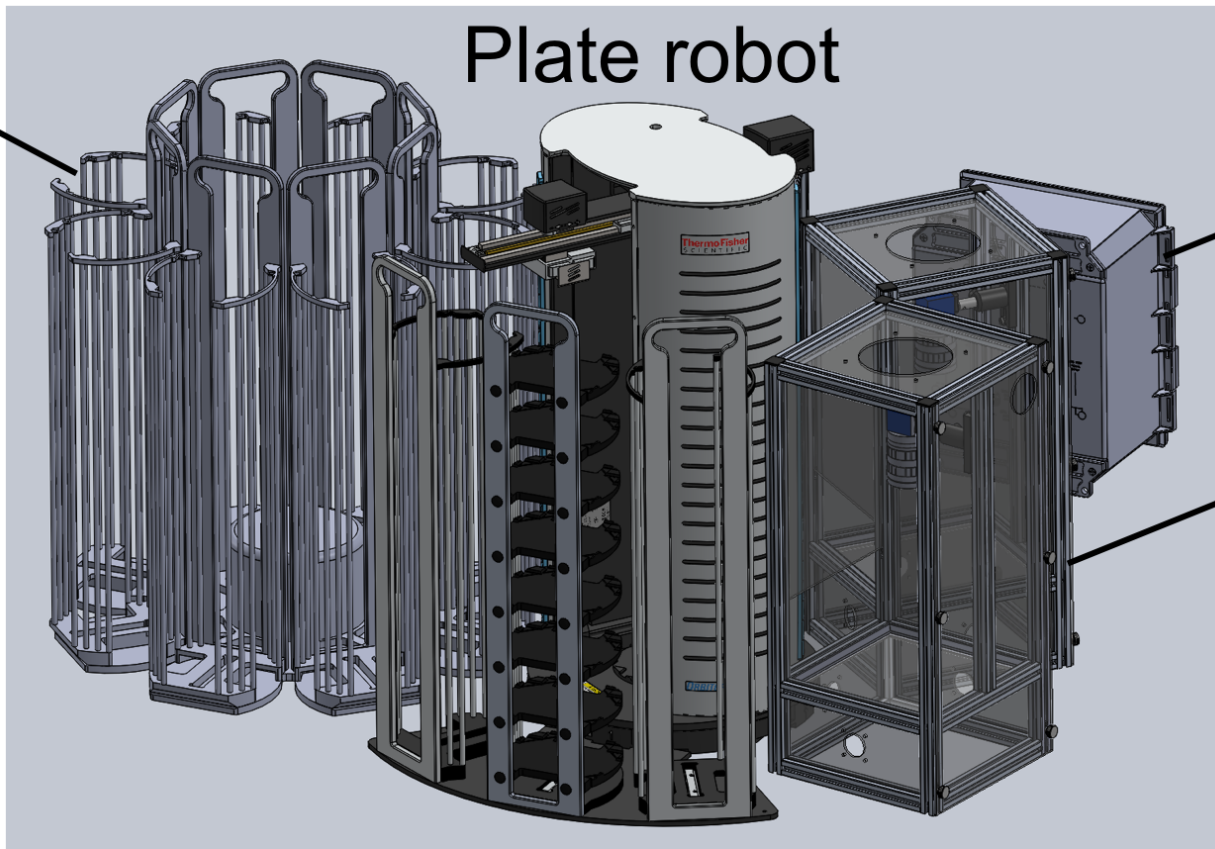

Supplement: supp [file elife-26652-supp-v1.zip]

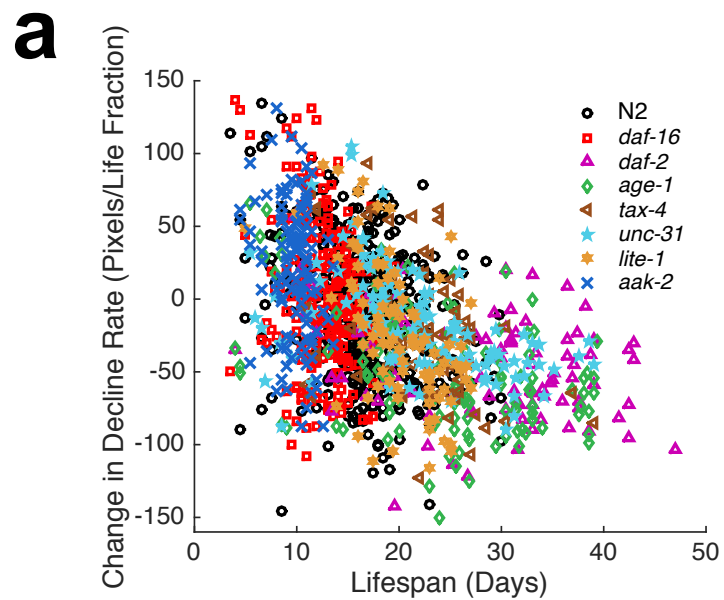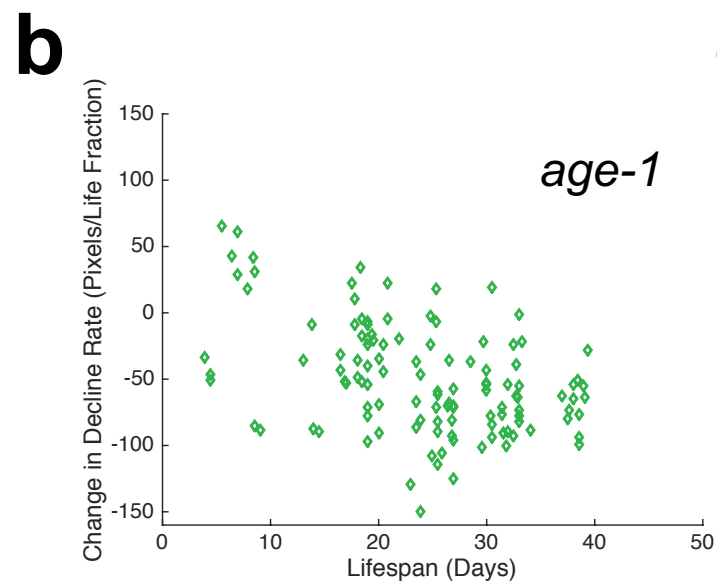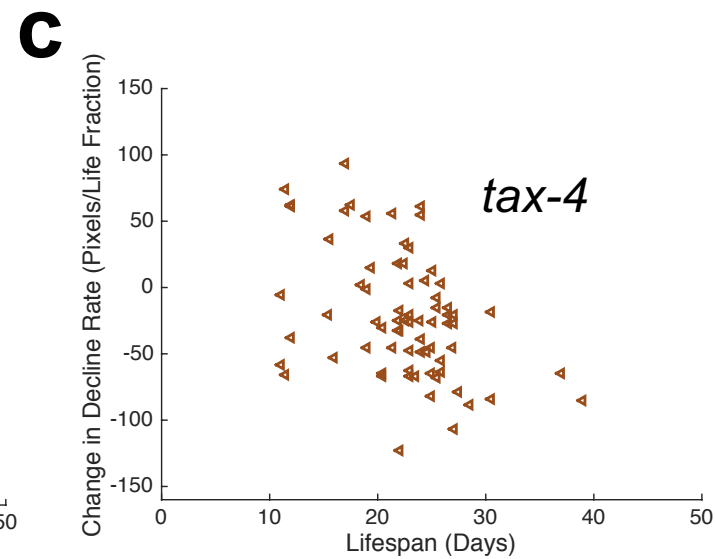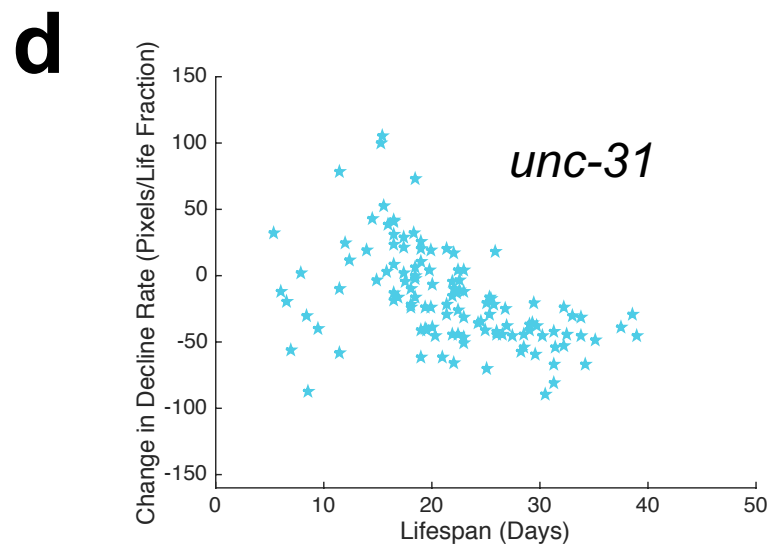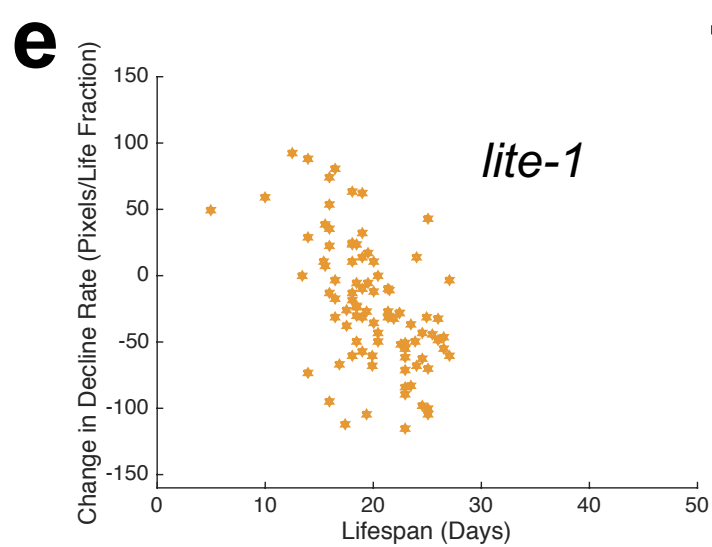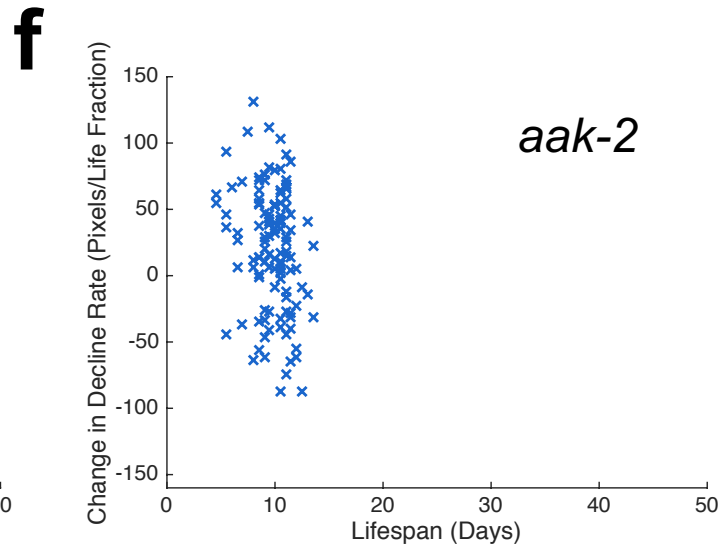

Supplement: supp [file elife-26652-supp-v1.zip]

**a**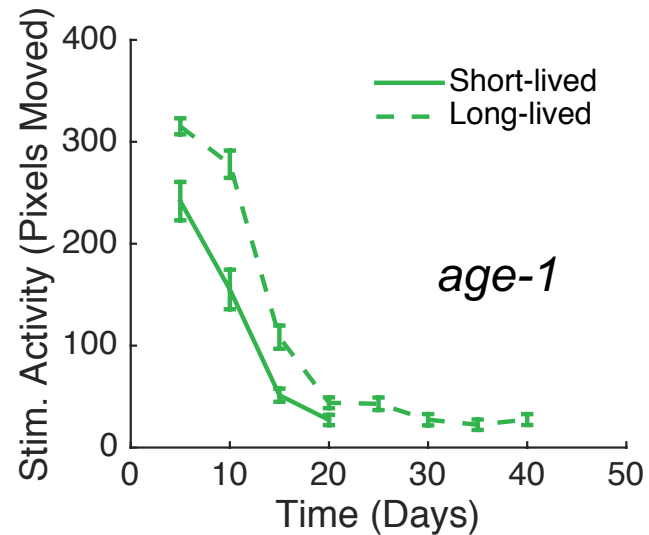**b**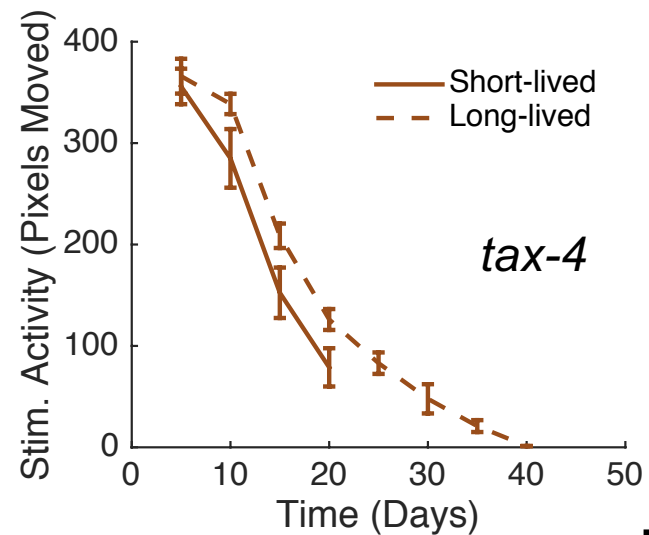**c**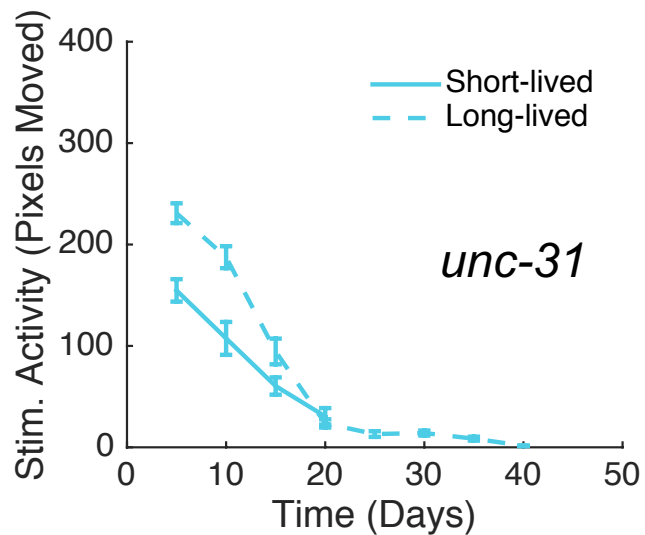**d**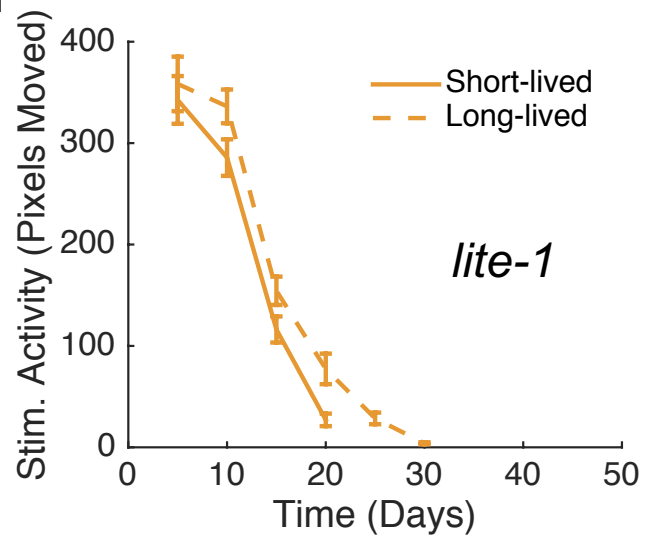**e**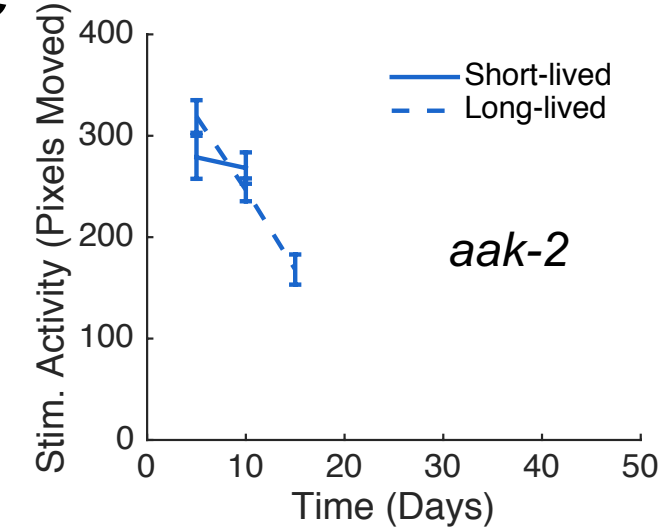**f**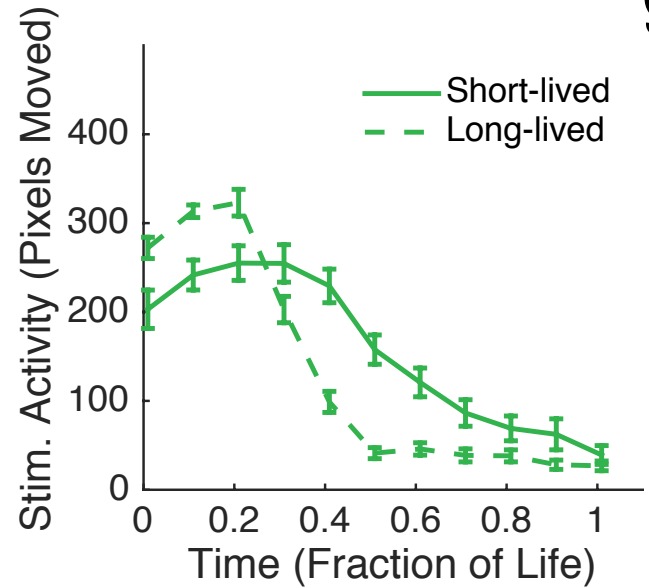**g**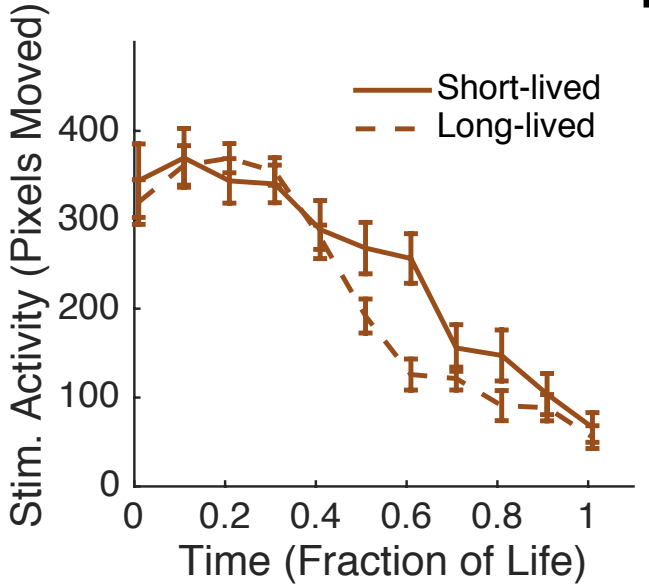**h**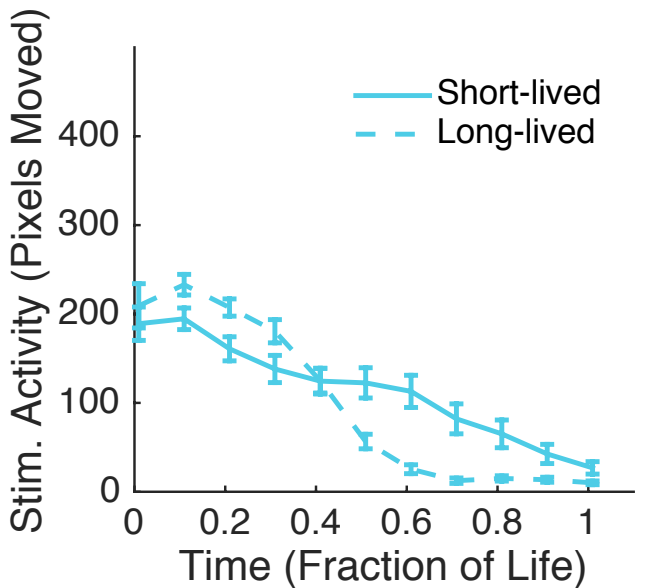**i**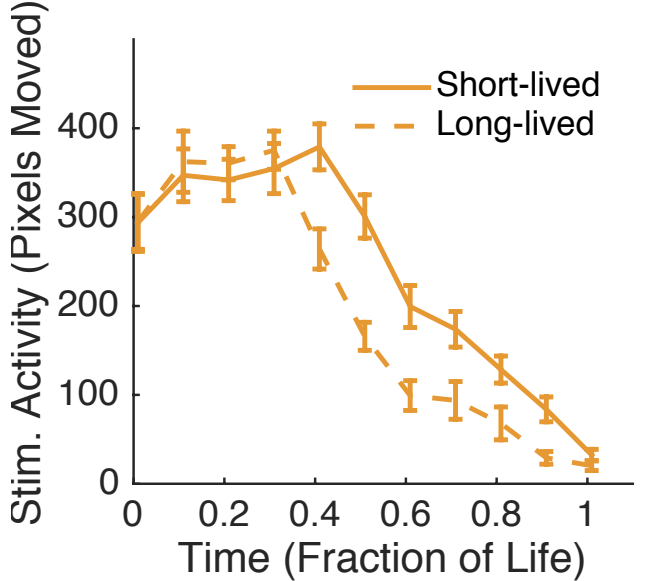**j**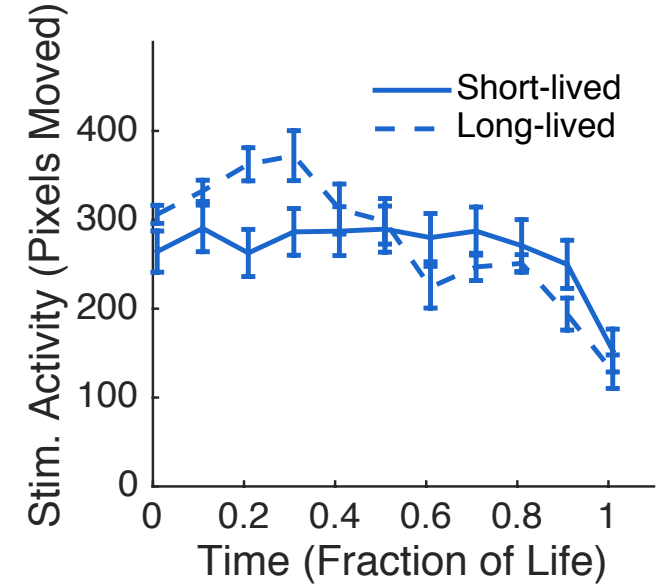

Supplement: supp [file elife-26652-supp-v1.zip]
